# Supplementary material
Source: Springer Nature journal article supplement (https://www.springermedizin.de/resource/supplementary/12943_2013_1333_MOESM2_ESM.pdf/9552728)
Supplement: MOESM2 [file 9552728]

**Additional File 2: Paediatric AML DNA methylation results compared to non-leukaemic methylation for the differentially methylated probes identified using HM450**

| <b>HM450 Probe</b> | <b>Leukaemic methylation</b> | <b>Non-leukaemic methylation</b> | <b>Difference</b> | <b>p-Value</b> |
|--------------------|------------------------------|----------------------------------|-------------------|----------------|
| CG10068417         | 53%                          | 16%                              | 37%               | <0.001         |
| CG09524946         | 36%                          | 9%                               | 27%               | <0.001         |
| CG07121900         | 62%                          | 28%                              | 34%               | <0.001         |
| CG05394800         | 62%                          | 9%                               | 53%               | <0.001         |
| CG20529344         | 63%                          | 25%                              | 38%               | <0.001         |
| CG12883980         | 61%                          | 22%                              | 39%               | <0.001         |
| CG23575603         | 88%                          | 60%                              | 28%               | <0.001         |
| <b>AVERAGE</b>     | <b>60.7%</b>                 | <b>24.14%</b>                    | <b>36.6%</b>      |                |
